# Supplementary material for: Nitrogen-Doped Carbon Dots Encapsulated a Polyoxomolybdate-Based Coordination Polymer as a Sensitive Platform for Trace Tetracycline Determination in Water
Source: MDPI journal article supplement (doi:10.3390/nano13192676), 2023-09-29
Supplement: s1 [file s1]

# Nitrogen-doped carbon dots encapsulated a polyoxomolybdate-based coordination polymer as a sensitive platform for trace tetracycline determination in water

Yanqiu Zhang<sup>1,2,\*</sup>, Minrui Sun<sup>1</sup>, Yang Lu<sup>1</sup>, Mingguo Peng<sup>2,\*</sup>, Erdeng Du<sup>2</sup>, Xia Xu<sup>2</sup>

<sup>1</sup> School of Environmental Science and Engineering, Changzhou University, Changzhou 213164, PR China; sunmrcczu1998@163.com (MR.S.); m17625046190@163.com (Y.L.)

<sup>2</sup> School of Urban Construction, Changzhou University, Changzhou 213164, China, PR China; duerdeng@gmail.com (ED.D.); xuxia@cczu.edu.cn (X.X.)

\* Correspondence: zhangyanqiu@cczu.edu.cn (YQ. Z. ); pmg@cczu.edu.cn (MG. P.)

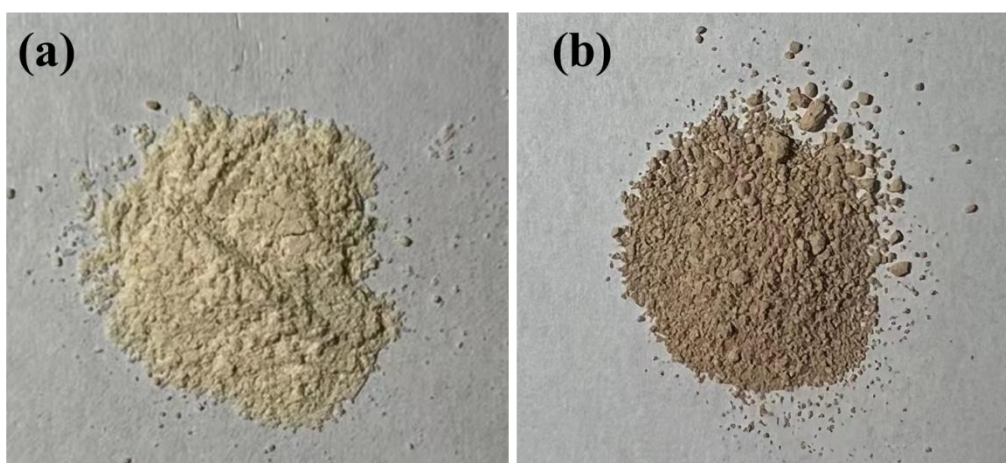

Figure S1. Photographs of (a)  $(4\text{-Hap})_4(\text{Mo}_8\text{O}_{26})$ , (b)  $\text{NCDs}@ (4\text{-Hap})_4(\text{Mo}_8\text{O}_{26})$  under natural light.

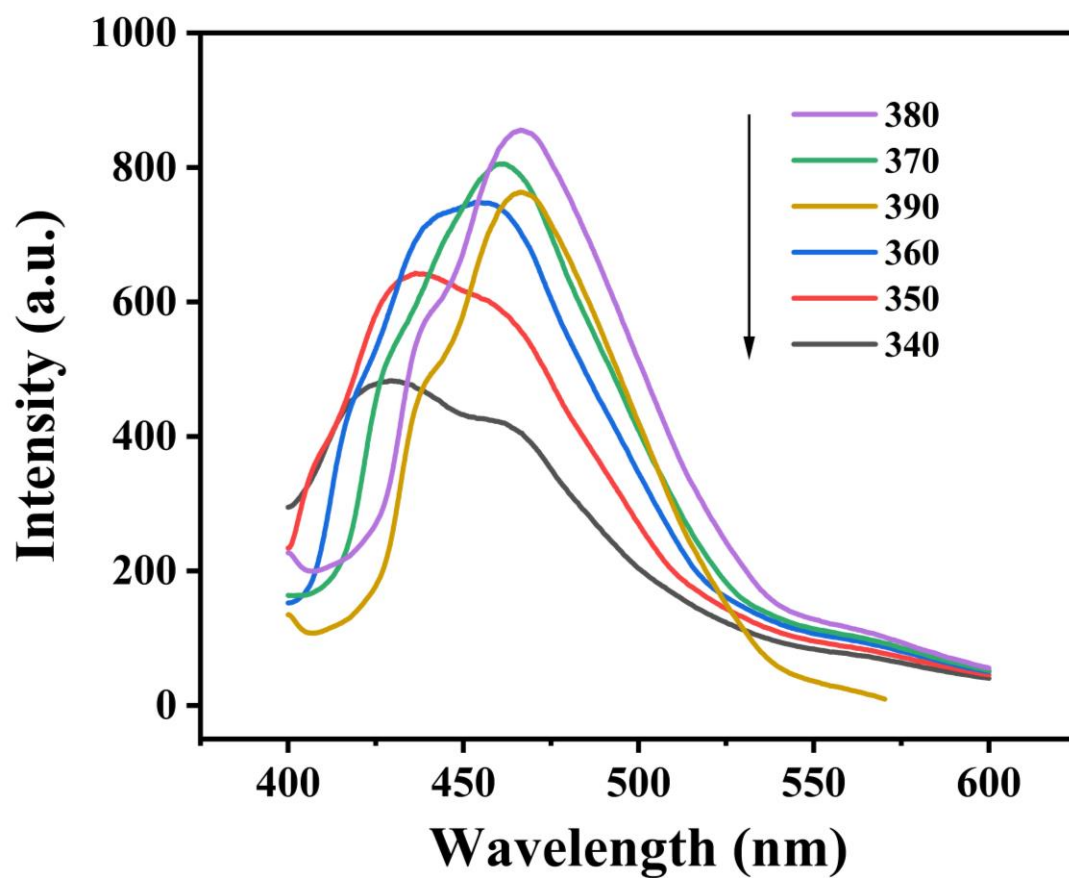

**Figure S2.** Emission spectra for NCDs@(4-Hap)<sub>4</sub>(Mo<sub>8</sub>O<sub>26</sub>) in water at different wavelengths.

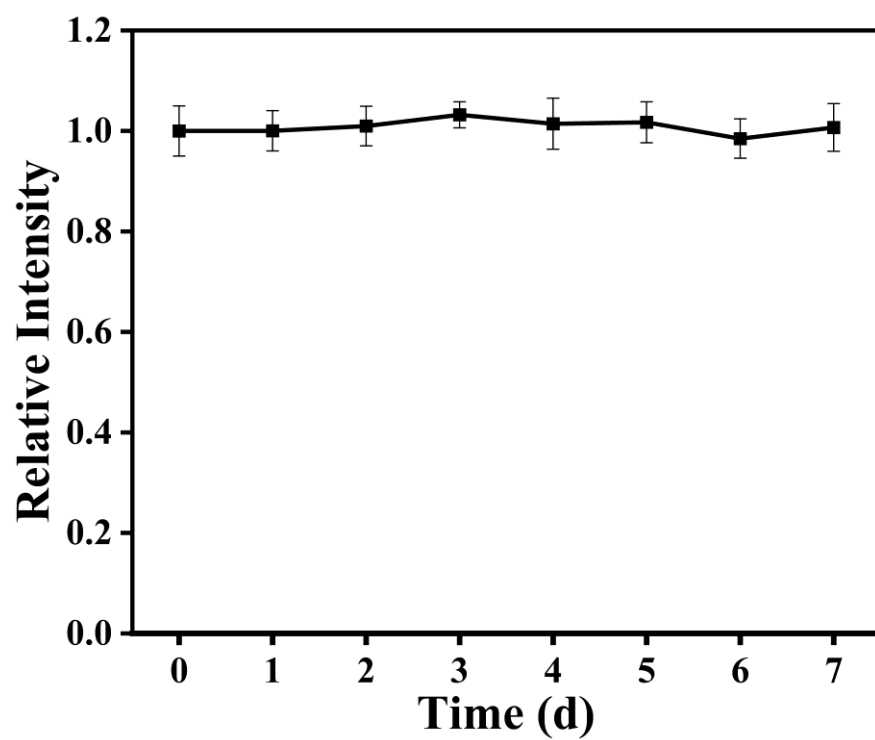

**Figure S3.** Relative fluorescence intensity of NCDs@(4-Hap)<sub>4</sub>(Mo<sub>8</sub>O<sub>26</sub>) with the excitation at 380 nm in 7 days.

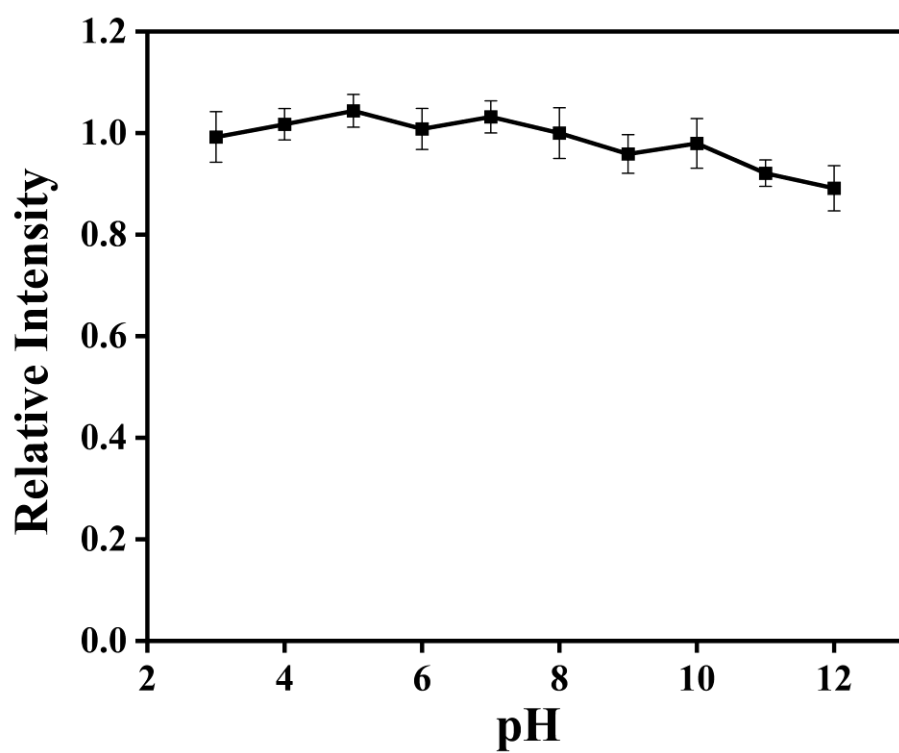

**Figure S4.** The relative fluorescence intensity of NCDs@(4-Hap)<sub>4</sub>(Mo<sub>8</sub>O<sub>26</sub>) in water under different pH ( $E_x = 380$  nm).

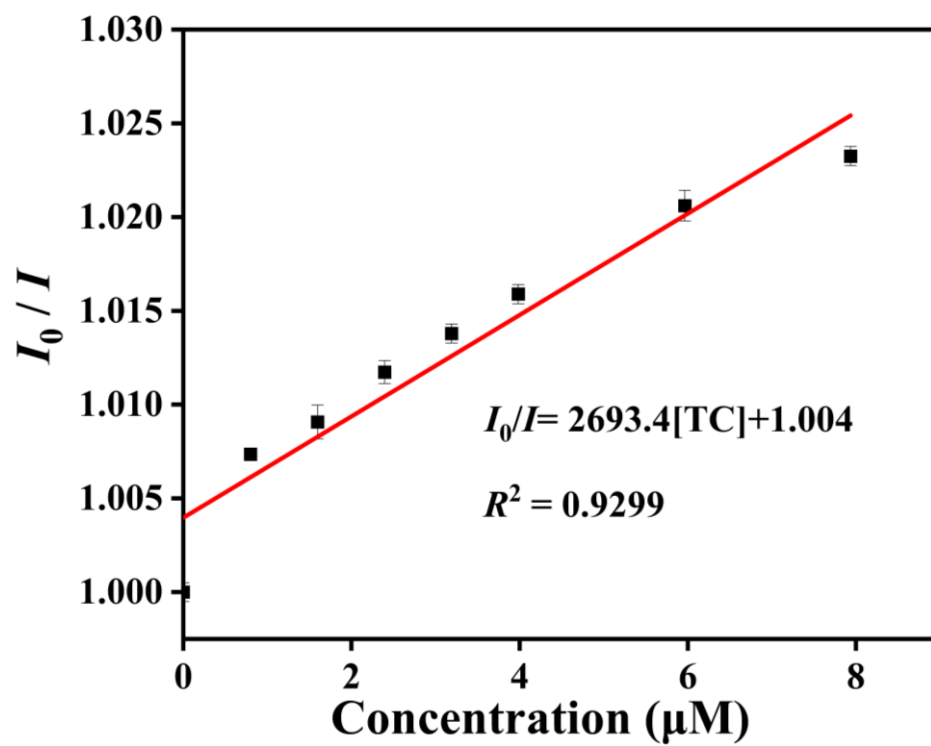

**Figure S5.** Calibration plot of the fluorescence intensity ratio ( $I_0/I$ ) versus concentrations of TC in 0-8  $\mu\text{M}$ .

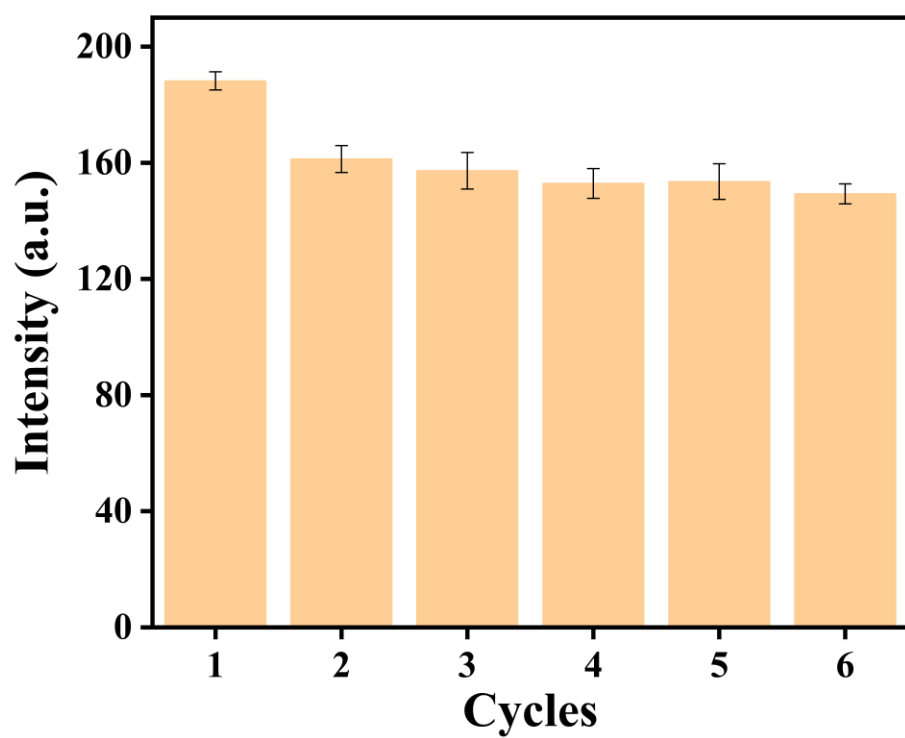

Figure S6. Recovery tests of NCDs@(4-Hap)<sub>4</sub>(Mo<sub>8</sub>O<sub>26</sub>) for TC sensing.
